# Supplementary material
Source: publisher site journal article supplement (https://www.dovepress.com/article/331178)

Figure S1: Kaplan-Meier survival curves of genes related to the OS of liver cancer.


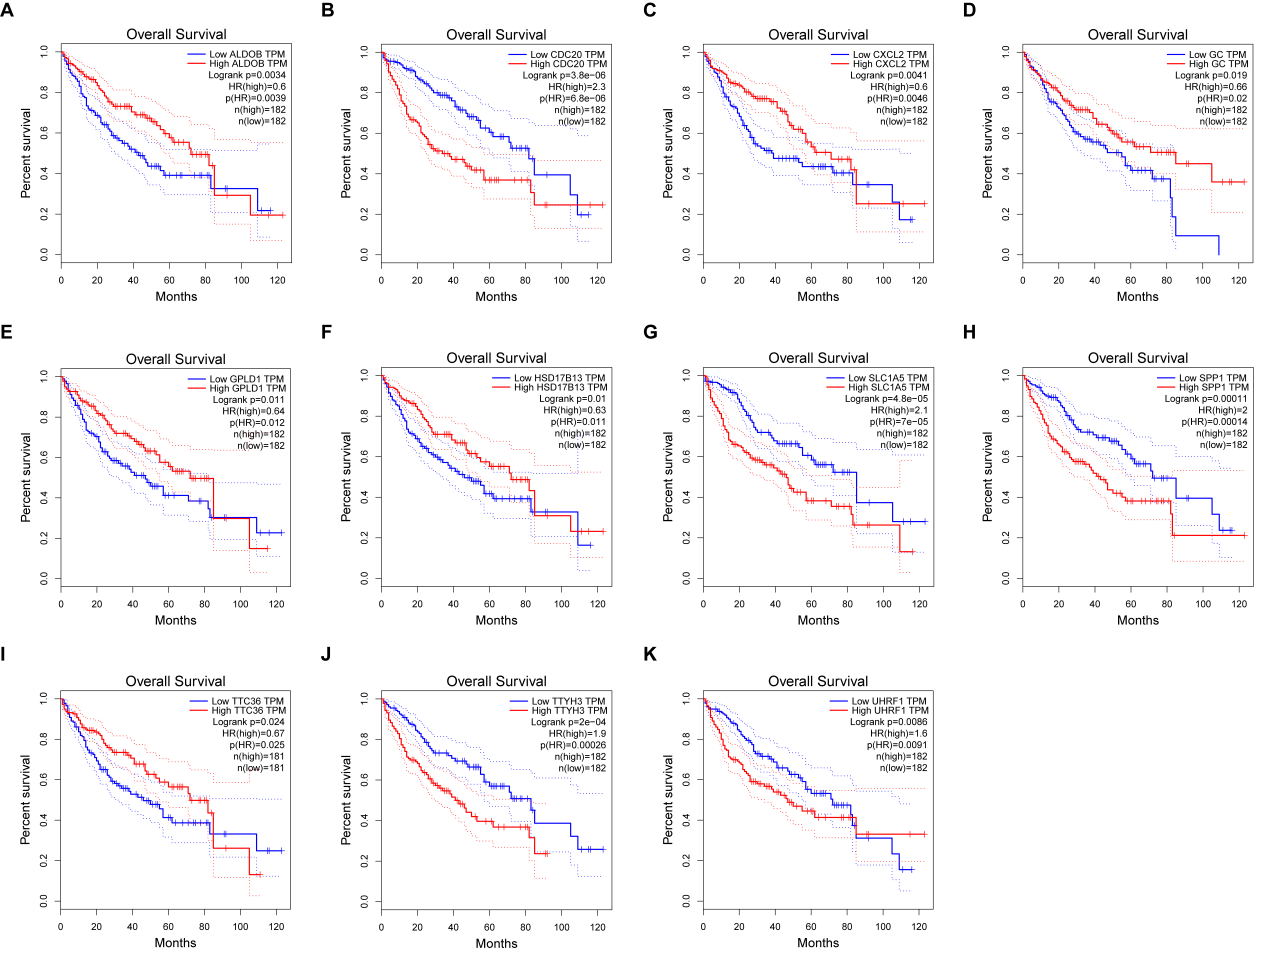


Figure S2: Kaplan-Meier survival curves of genes related to the DFS of liver cancer.


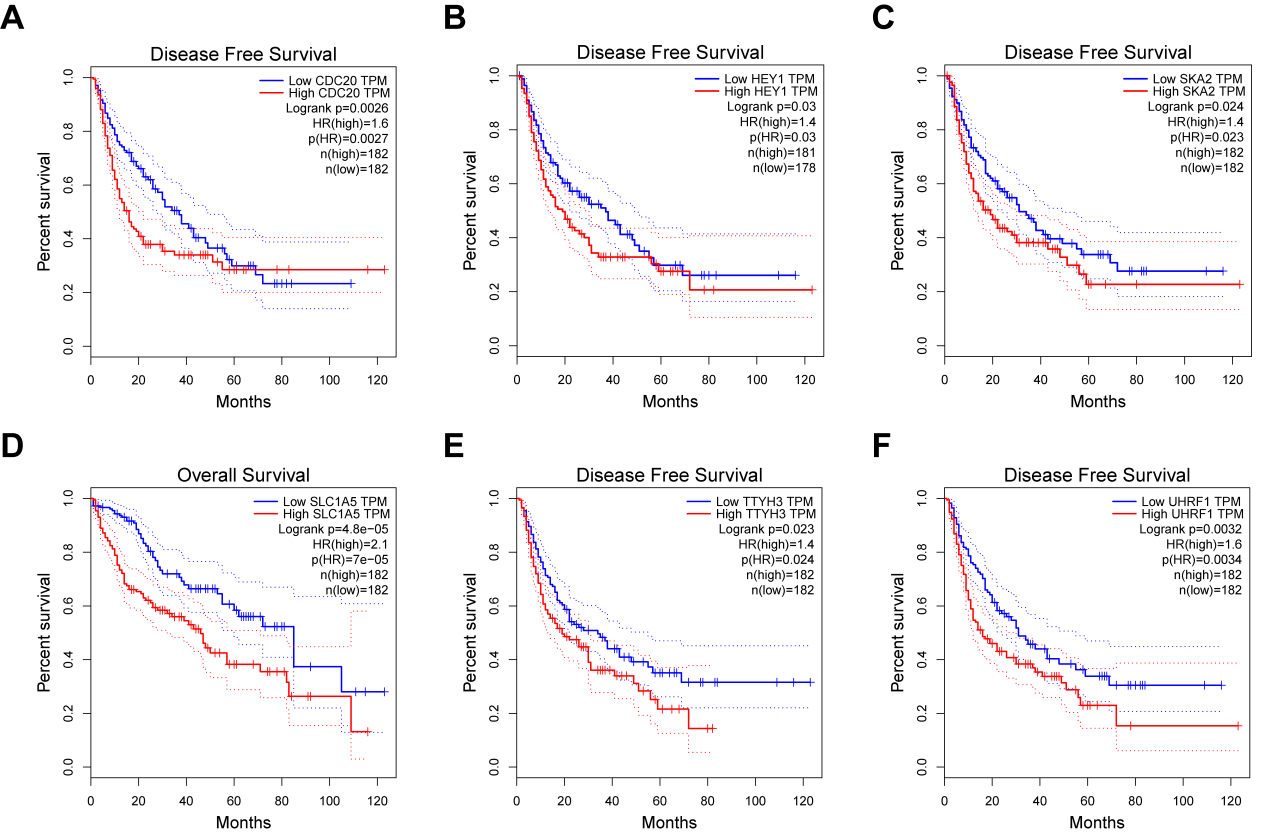


Figure S3: Expression levels of key DNA methylation-regulated genes among different clinical features.


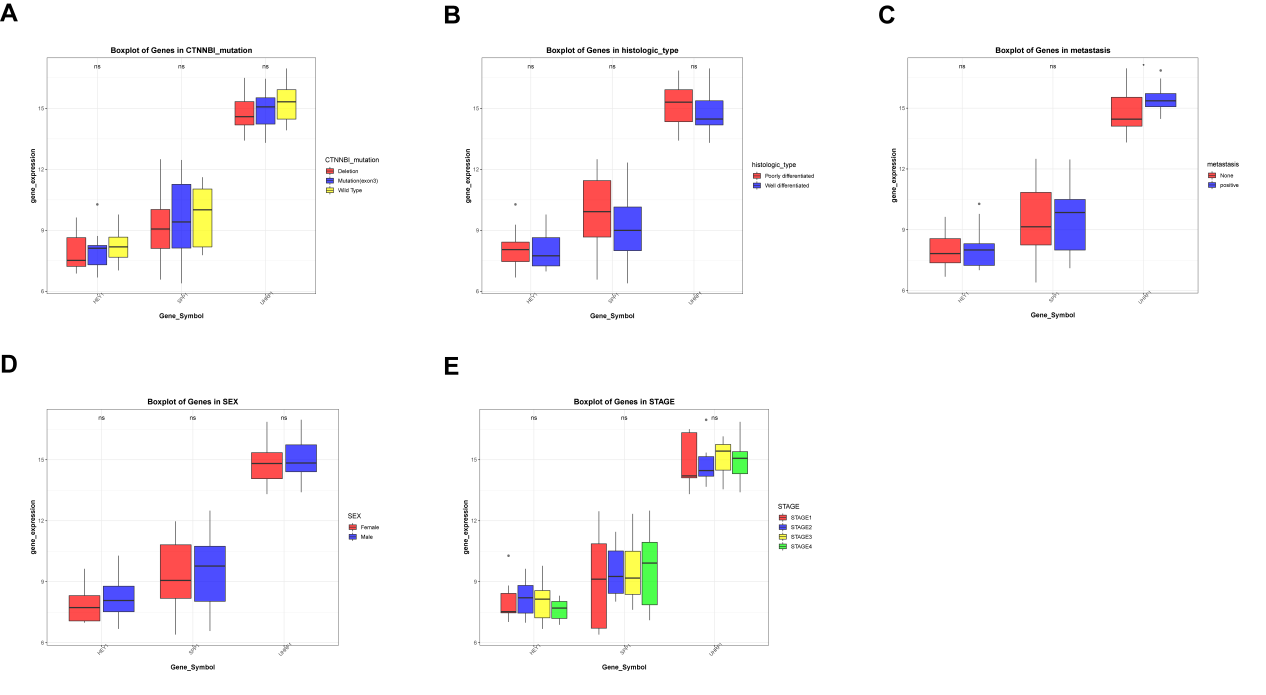

Supplement: Supplementary file 1 [file get_supplementary_file.php]
